# Supplementary material
Source: PubMed Central journal article supplement (PMC5473210)
Supplement: 10.1074_M117.778233_jbc.M117.778233-1.pdf [file 10.1074_M117.778233_jbc.M117.778233-1.pdf]

## **Cell Cycle-dependent Regulation of Greatwall Kinase by Protein Phosphatase 1 and Regulatory Subunit 3B**

Dapeng Ren\*<sup>1</sup>, Laura A. Fisher\*<sup>1</sup>, Jing Zhao<sup>1</sup>, Ling Wang<sup>1</sup>, Byron C. Williams<sup>2</sup>, Michael L. Goldberg<sup>2</sup>,  
and Aimin Peng<sup>1,3</sup>

<sup>1</sup>Department of Oral Biology, College of Dentistry, University of Nebraska Medical Center,  
Lincoln, NE 68583, USA.

<sup>2</sup>Department of Molecular Biology and Genetics, Cornell University, Ithaca, NY 14853, USA

<sup>3</sup>To whom correspondence should be addressed: Aimin Peng, Ph.D. Department of Oral Biology,  
College of Dentistry, University of Nebraska Medical Center, Lincoln, NE 68583. USA. Tel: 1-  
402-472-5903, Fax: 1-402-472-2551. Email: [Aimin.Peng@UNMC.edu](mailto:Aimin.Peng@UNMC.edu)

\* These authors contributed equally to this work.

Running title: PP1 and PPP1R3B regulate Greatwall autophosphorylation.

Keywords: Greatwall/mitosis/phosphatase/PP1/PPP1R3B.

---

Supplemental Figures

Figure S1 & S2

Fig S1.

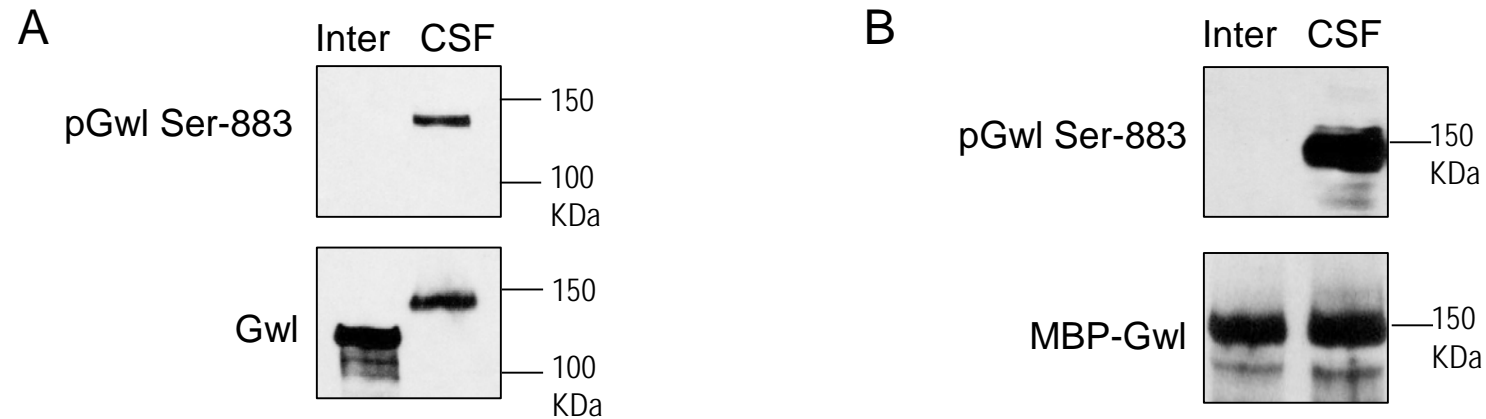

**Figure S1. Characterization of Gwl Ser-883 antibody.** (A) Interphase and M-phase (CSF) extracts were analyzed by immunoblotting for phospho-Gwl Ser-883 and Gwl. (B) MBP-Gwl was incubated in interphase or CSF extracts, re-isolated, and subjected to immunoblotting for phospho-Gwl Ser-883 and MBP.

Fig S2.

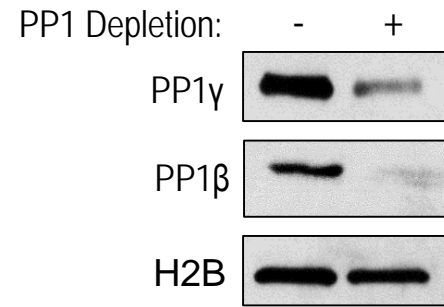

**Figure S2. Depletion of PP1 with the Pnuts PP1 binding domain.** The Pnuts peptide containing the RVxF PP1-binding motif was incubated in *Xenopus* interphase extract. A mock depletion was performed as control. The resulting extracts were subjected to immunoblotting for PP1 $\beta$  and PP1 $\gamma$ .
